# Supplementary material
Source: Springer Nature journal article supplement (https://www.springermedizin.de/resource/supplementary/12887_2012_736_MOESM1_ESM.pdf/9475630)
Supplement: MOESM1 [file 9475630]

# DISTRIBUTION OF DISTRICTS & UPAZILAS FOR HOSPITAL ASSESSMENT

## District Hospitals (DHs)

Chittagong DH  
 Khulna DH  
 Madaripur DH  
 Moulvibazar DH  
 Potuakhali DH  
 Jaypurhat DH

## Upazila Health Complexes (UHCs)

Hathazari UHC  
 Lohagora UHC  
 Khetlal UHC  
 Panchbibi UHC  
 Shibchor UHC  
 Rajor UHC  
 Bauphol UHC  
 Dashmina UHC  
 Borolekha UHC  
 Shreemongol UHC  
 Dacope UHC  
 Rupsha UHC

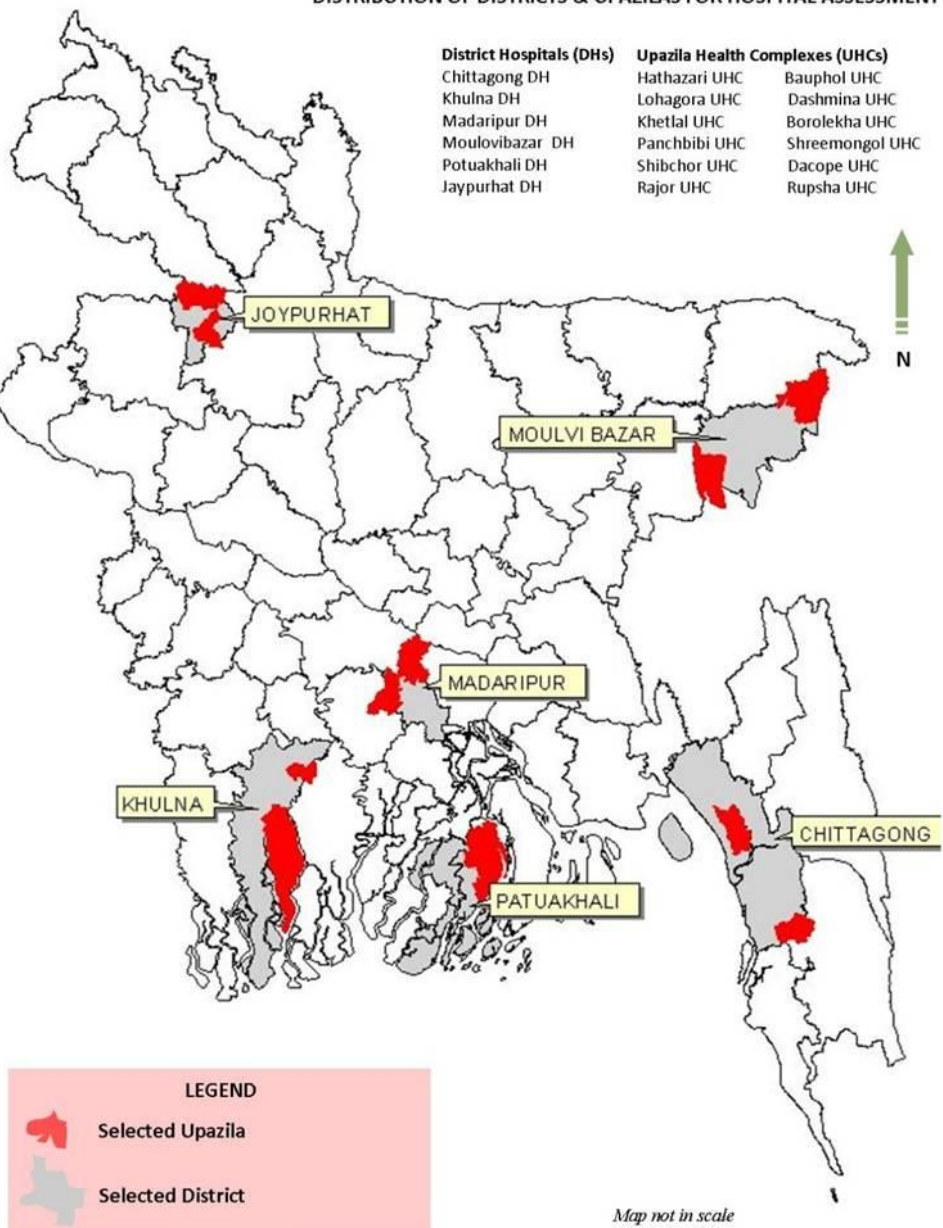

### LEGEND

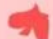

Selected Upazila

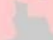

Selected District

Map not in scale
